# Supplementary material
Source: PubMed Central journal article supplement (PMC6448767)
Supplement: NIHMS1509462-supplement-Supplemental_Digital_Content.pdf [file NIHMS1509462-supplement-Supplemental_Digital_Content.pdf]

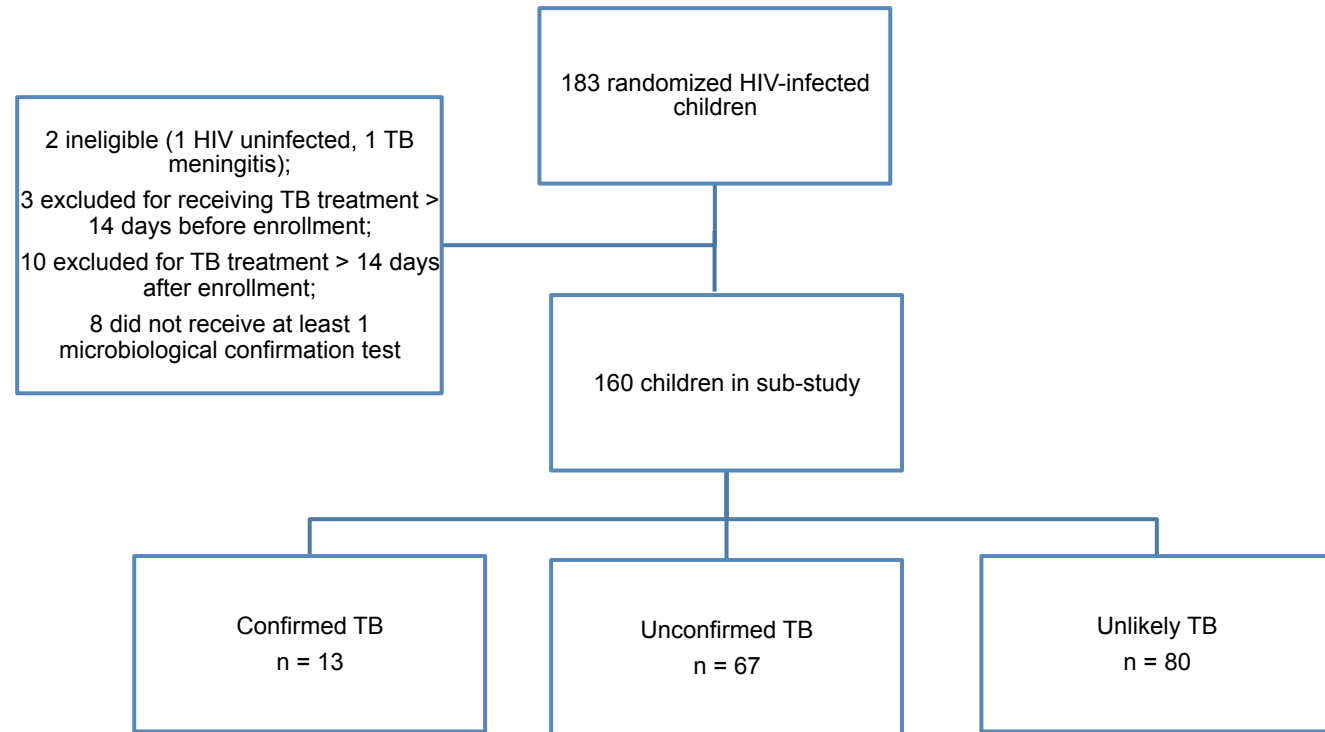

**Supplemental Digital Content 1: Study participant inclusion flow-chart.**

**Supplemental Digital Content 2: MLR cutoffs identifying TB confirmed patients with corresponding sensitivity, specificity, positive predictive value, negative predictive value and area under curve values. The optimal MLR cutoff above 0.378 had sensitivity 78.6%, specificity 77.4%, positive predictive value 23.9%, and negative predictive value 97.6%.**

| <b>MLR Distribution Percentile</b>       | <b>MLR Cutoff Value</b> | <b>Sensitivity (%), 95% CI</b> | <b>Specificity (%), 95% CI</b> | <b>Positive Predictive Value (%), 95% CI</b> | <b>Negative Predictive Value (%), 95% CI</b> | <b>Area Under Curve, 95% CI</b> |
|------------------------------------------|-------------------------|--------------------------------|--------------------------------|----------------------------------------------|----------------------------------------------|---------------------------------|
| 5 <sup>th</sup>                          | 0.069                   | 100 (77.2, 100)                | 4.8 (2.4, 9.6)                 | 8.6 (5.1, 14.2)                              | 100 (64.6, 100)                              | 0.52 (0.51, 0.54)               |
| 10 <sup>th</sup>                         | 0.094                   | 92.3 (66.7, 98.6)              | 9.7 (5.8, 15.6)                | 8.4 (4.9, 14.1)                              | 93.3 (70.2, 98.8)                            | 0.51 (0.43, 0.59)               |
| 25 <sup>th</sup>                         | 0.148                   | 92.3 (66.7, 98.6)              | 26.2 (19.7, 33.9)              | 10.1 (5.9, 16.8)                             | 97.4 (86.8, 99.6)                            | 0.59 (0.51, 0.68)               |
| 50 <sup>th</sup>                         | 0.214                   | 84.6 (57.8, 95.7)              | 53.1 (45.0, 61.0)              | 13.9 (8.0, 23.2)                             | 97.5 (91.2, 99.3)                            | 0.69 (0.58, 0.80)               |
| 73.4 <sup>th</sup>                       | 0.378*                  | 76.9 (49.7, 91.8)              | 77.9 (70.5, 83.9)              | 23.8 (13.5, 38.5)                            | 97.4 (92.7, 99.1)                            | 0.74 (0.58, 0.89)               |
| 95 <sup>th</sup>                         | 1.043                   | 15.4 (4.3, 42.2)               | 95.9 (91.3, 98.1)              | 25.0 (7.1, 59.1)                             | 92.7 (87.4, 95.9)                            | 0.56 (0.45, 0.66)               |
| < 5 <sup>th</sup> and > 95 <sup>th</sup> | -                       | 15.4 (4.3, 42.2)               | 91.0 (85.3, 94.7)              | 13.3 (3.7, 37.9)                             | 92.3 (86.8, 95.7)                            | 0.53 (0.43, 0.64)               |

\*Optimal MLR cut-off value defined by the maximum value of Youden's index, J, where J = sensitivity + specificity – 1.

**Supplemental Digital Content 3A: Median blood monocyte count by visit week and TB classification.**

| Time from Enrollment (weeks) | Overall <i>median (IQR<sup>a</sup>), n</i> | TB Confirmed <i>median (IQR), n</i> | TB Unconfirmed <i>median (IQR), n</i> | TB Unlikely <i>median (IQR), n</i> | TB Confirmed p-value <sup>b</sup> | TB Unconfirmed p-value <sup>b</sup> |
|------------------------------|--------------------------------------------|-------------------------------------|---------------------------------------|------------------------------------|-----------------------------------|-------------------------------------|
| <b>0</b>                     | 1.10 (0.64 - 1.87), 158                    | 1.68 (1.14 - 2.19), 13              | 0.89 (0.61 - 1.79), 66                | 1.09 (0.65 - 1.86), 79             | 0.07                              | 0.58                                |
| <b>4</b>                     | 0.66 (0.43 - 1.12), 124                    | 0.94 (0.54 - 1.11), 9               | 0.72 (0.43 - 1.51), 54                | 0.62 (0.36 - 0.88), 61             | 0.18                              | 0.11                                |
| <b>12</b>                    | 0.57 (0.33 - 0.93), 118                    | 0.58 (0.34 - 1.66), 5               | 0.50 (0.33 - 0.90), 52                | 0.61 (0.32 - 0.91), 61             | 0.78                              | 0.79                                |
| <b>24</b>                    | 0.44 (0.30 - 0.76), 116                    | 0.61 (0.26 - 0.96), 6               | 0.41 (0.29 - 0.75), 50                | 0.48 (0.33 - 0.72), 60             | 0.86                              | 0.54                                |

**Supplemental Digital Content 3B: Median blood lymphocyte count by visit week and TB classification.**

| Time from Enrollment (weeks) | Overall <i>median (IQR<sup>a</sup>), n</i> | TB Confirmed <i>median (IQR), n</i> | TB Unconfirmed <i>median (IQR), n</i> | TB Unlikely <i>median (IQR), n</i> | TB Confirmed p-value <sup>b</sup> | TB Unconfirmed p-value <sup>b</sup> |
|------------------------------|--------------------------------------------|-------------------------------------|---------------------------------------|------------------------------------|-----------------------------------|-------------------------------------|
| <b>0</b>                     | 5.15 (3.09 - 7.85), 159                    | 3.85 (2.19 - 6.88), 13              | 4.86 (3.10 - 8.82), 67                | 5.49 (3.05 - 7.85), 79             | 0.28                              | 0.91                                |
| <b>4</b>                     | 5.71 (3.08 - 8.80), 124                    | 4.03 (1.59 - 5.55), 9               | 5.02 (3.07 - 8.91), 54                | 6.53 (3.70 - 9.40), 61             | 0.02                              | 0.4                                 |
| <b>12</b>                    | 6.24 (3.42 - 8.70), 118                    | 3.29 (3.02 - 4.87), 5               | 6.02 (3.20 - 7.94), 52                | 6.73 (4.02 - 9.08), 61             | 0.07                              | 0.21                                |
| <b>24</b>                    | 5.48 (3.62 - 8.61), 116                    | 3.55 (2.56 - 5.41), 6               | 5.10 (3.61 - 9.81), 50                | 6.05 (4.00 - 8.61), 60             | 0.1                               | 0.57                                |

<sup>a</sup>Interquartile range.<sup>b</sup>Wilcoxon two-sample test t approximation reported. Reference group is TB Unlikely.

**Sensitivity Analysis 4: MLR trends including subjects who completed the study<sup>#</sup> and excluding subjects who did not complete the study<sup>&</sup>.**

<sup>#</sup>N=117 completed study                      <sup>&</sup>N=44 (30 died, 7 refused further participation, 1 relocated, 5 lost to follow-up)

**Supplemental Digital Content 4.1: Median blood monocyte to lymphocyte ratio (MLR) by visit week and TB classification among participants who completed the study, excluding those who died or were lost to follow-up.**

| Time from Enrollment (weeks) | Overall <i>median (IQR<sup>a</sup>), n</i> | TB Confirmed <i>median (IQR), n</i> | TB Unconfirmed <i>median (IQR), n</i> | TB Unlikely <i>median (IQR), n</i> | TB Confirmed p-value <sup>b</sup> | TB Unconfirmed p-value <sup>b</sup> |
|------------------------------|--------------------------------------------|-------------------------------------|---------------------------------------|------------------------------------|-----------------------------------|-------------------------------------|
| 0                            | 0.204 (0.140 - 0.353), 115                 | 0.402 (0.378 - 0.825), 6            | 0.192 (0.142 - 0.314), 49             | 0.203 (0.136 - 0.332), 60          | 0.03                              | 0.8                                 |
| 4                            | 0.114 (0.080 - 0.206), 114                 | 0.306 (0.108 - 0.581), 6            | 0.139 (0.093 - 0.217), 50             | 0.098 (0.074 - 0.151), 58          | 0.04                              | 0.01                                |
| 12                           | 0.095 (0.065 - 0.145), 115                 | 0.119 (0.115 - 0.532), 5            | 0.094 (0.065 - 0.141), 50             | 0.093 (0.051 - 0.146), 60          | 0.22                              | 0.71                                |
| 24                           | 0.078 (0.055 - 0.121), 116                 | 0.109 (0.048 - 0.348), 6            | 0.077 (0.054 - 0.119), 50             | 0.078 (0.057 - 0.119), 60          | 0.51                              | 0.79                                |

<sup>a</sup>Interquartile range. <sup>b</sup>Wilcoxon two-sample test t approximation reported. Reference group is TB Unlikely.

**Supplemental Digital Content 4.2: Median blood monocyte-to-lymphocyte ratio over visit weeks from enrollment by TB classification (TB confirmed, unconfirmed or unlikely) among participants who completed the study.**

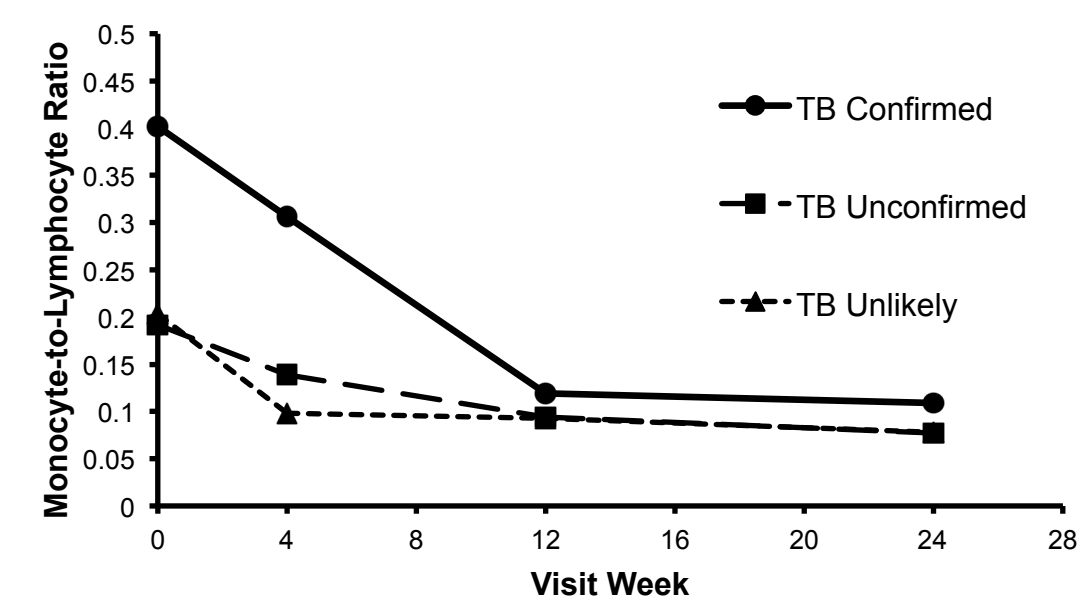

**Sensitivity Analysis 5: Comparison of MLR trends by treatment success or treatment failure/death before completing the study.**

**Supplemental Digital Content 5.1: Median blood monocyte to lymphocyte ratio (MLR) at enrollment among participants who had treatment success versus treatment failure/death.**

|                                                  | <i>Median (IQR), n</i>                 | p-value |
|--------------------------------------------------|----------------------------------------|---------|
| Enrollment MLR, treatment success                | 0.209 (0.147, 0.375), 40               | 0.06    |
| Enrollment MLR, treatment failure/died           | 0.346 (0.271, 0.632), 8                |         |
|                                                  |                                        |         |
| Overall <sup>a</sup> MLR, treatment success      | 0.119 (0.074, 0.214), 162 <sup>b</sup> | <0.01   |
| Overall <sup>a</sup> MLR, treatment failure/died | 0.286 (0.189, 0.589), 14 <sup>b</sup>  |         |

<sup>a</sup>Median MLR over all time points; <sup>b</sup>Number of timepoints.

**Supplemental Digital Content 5.2: Median blood monocyte to lymphocyte ratio (MLR) by visit week and TB classification among participants who had TB treatment success.**

| Time from Enrollment (weeks) | Overall <i>median (IQR)<sup>a</sup>, n</i> | TB Confirmed <i>median (IQR), n</i> | TB Unconfirmed <i>median (IQR), n</i> | TB Unlikely <i>median (IQR), n</i> | TB Confirmed p-value <sup>b</sup> | TB Unconfirmed p-value <sup>b</sup> |
|------------------------------|--------------------------------------------|-------------------------------------|---------------------------------------|------------------------------------|-----------------------------------|-------------------------------------|
| <b>0</b>                     | 0.209 (0.147 - 0.375), 40                  | 0.402 (0.378 - 0.825), 6            | 0.188 (0.142 - 0.348), 34             | -                                  | -                                 | -                                   |
| <b>4</b>                     | 0.139 (0.088 - 0.224), 40                  | 0.306 (0.108 - 0.581), 6            | 0.129 (0.085 - 0.214), 34             | -                                  | -                                 | -                                   |
| <b>12</b>                    | 0.100 (0.065 - 0.128), 38                  | 0.119 (0.115 - 0.532), 5            | 0.093 (0.065 - 0.121), 33             | -                                  | -                                 | -                                   |
| <b>24</b>                    | 0.076 (0.054 - 0.122), 37                  | 0.109 (0.048 - 0.348), 6            | 0.074 (0.054 - 0.114), 31             | -                                  | -                                 | -                                   |

<sup>a</sup>Interquartile range; <sup>b</sup>Wilcoxon two-sample test t approximation reported. Reference group is TB Unlikely.

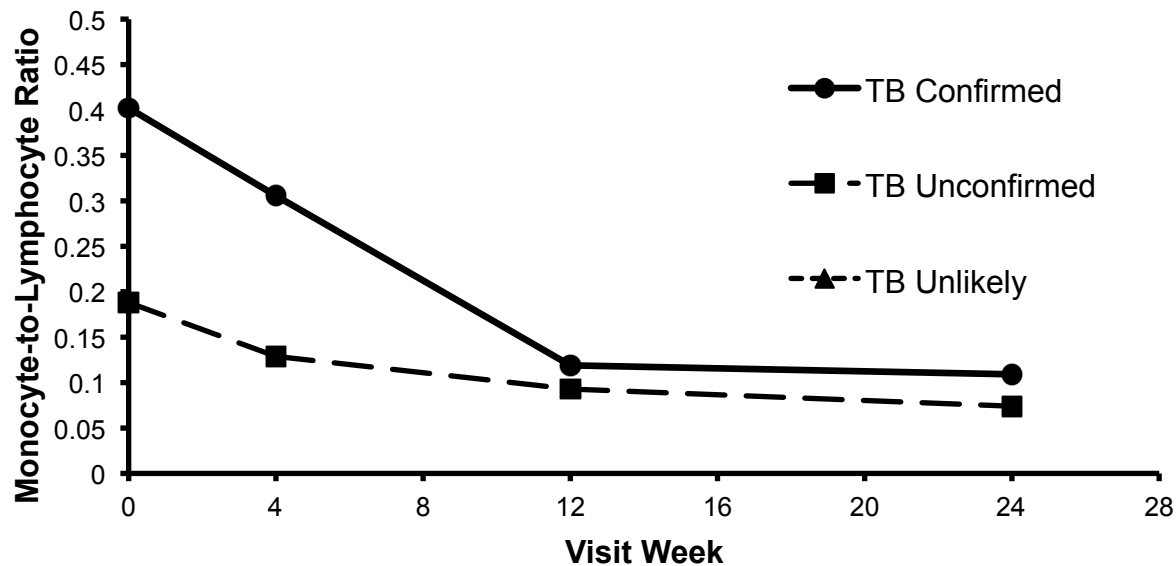

**Supplemental Digital Content 5.3: Median blood monocyte-to-lymphocyte ratio over visit weeks from enrollment by TB classification (TB confirmed, unconfirmed or unlikely) among participants who had TB treatment success.**

**Supplemental Digital Content 5.4: Median blood monocyte to lymphocyte ratio (MLR) by visit week and TB classification among participants who had TB treatment failure or who died.**

| Time from Enrollment (weeks) | Overall <i>median (IQR<sup>a</sup>), n</i> | TB Confirmed <i>median (IQR), n</i> | TB Unconfirmed <i>median (IQR), n</i> | TB Unlikely <i>median (IQR), n</i> | TB Confirmed p-value <sup>b</sup> | TB Unconfirmed p-value <sup>b</sup> |
|------------------------------|--------------------------------------------|-------------------------------------|---------------------------------------|------------------------------------|-----------------------------------|-------------------------------------|
| 0                            | 0.346 (0.271 - 0.632), 8                   | 0.632 (0.495 - 1.269), 4            | 0.275 (0.259 - 0.291), 2              | 236 (0.189 - 0.282),               | 0.17                              | 0.72                                |
| 4                            | 0.340 (0.131 - 0.694), 3                   | 0.517 (0.340 - 0.694), 2            | -                                     | 131 (0.131 - 0.131),               | 0.6                               | -                                   |
| 12                           | 0.158 (0.158 - 0.158), 1                   | -                                   | -                                     | 158 (0.158 - 0.158),               | -                                 | -                                   |
| 24                           | 0.191 (0.191 - 0.191), 1                   | -                                   | -                                     | 191 (0.191 - 0.191),               | -                                 | -                                   |

<sup>a</sup>Interquartile range; <sup>b</sup>Wilcoxon two-sample test t approximation reported. Reference group is TB Unlikely.

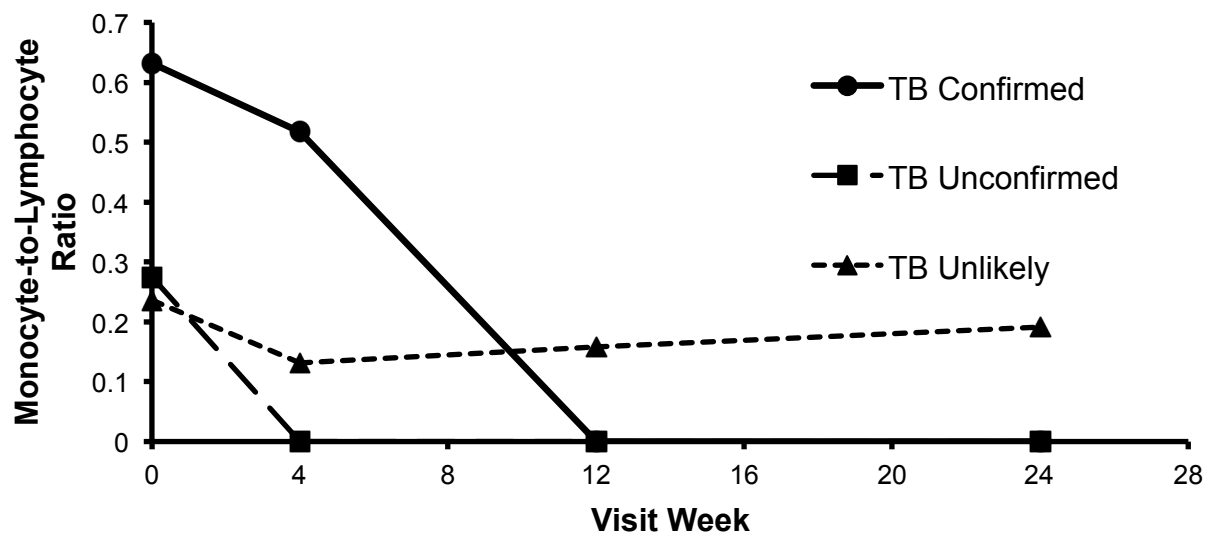

**Supplemental Digital Content 5.5: Median blood monocyte-to-lymphocyte ratio over visit weeks from enrollment by TB classification (TB confirmed, unconfirmed or unlikely) among participants who had TB treatment failure or who died.**

**Supplemental Digital Content 5.6: Association of TB confirmed and TB unconfirmed groups with monocyte-lymphocyte ratio (MLR) over all study intervals among patients who had TB treatment success or had TB treatment failure or died.**

|                |                  | MLR, TB treatment success |                 |               | MLR, TB treatment failure/death |      |               |
|----------------|------------------|---------------------------|-----------------|---------------|---------------------------------|------|---------------|
|                |                  | $\beta^a$                 | SE <sup>b</sup> | Model p-value | $\beta$                         | SE   | Model p-value |
| TB Confirmed   | Unadjusted model | -                         | -               | -             | 0.60                            | 0.24 | 0.01          |
| TB Unconfirmed | Unadjusted model | -                         | -               | -             | 0.10                            | 0.01 | <0.01         |
| TB Unlikely    |                  | ref                       |                 |               | ref                             |      |               |

<sup>a</sup>Parameter estimate; <sup>b</sup>Standard error.
